# Supplementary material for: Long-Term Tailor-Made Exercise Intervention Reduces the Risk of Developing Cardiovascular Diseases and All-Cause Mortality in Patients with Diabetic Kidney Disease
Source: MDPI journal article supplement (doi:10.3390/jcm12020691), 2023-01-15
Supplement: s1 [file s1]

Figure S1 Logit conversion score and distribution of propensity scores before and after matching

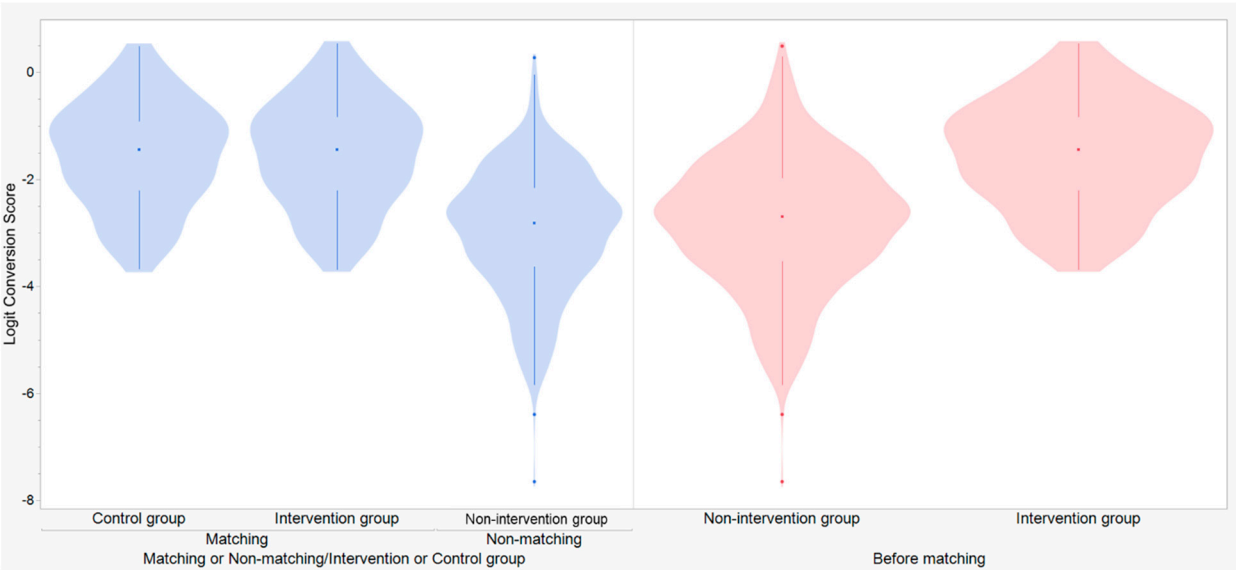

Figure S2 Changes in eGFRcr over time

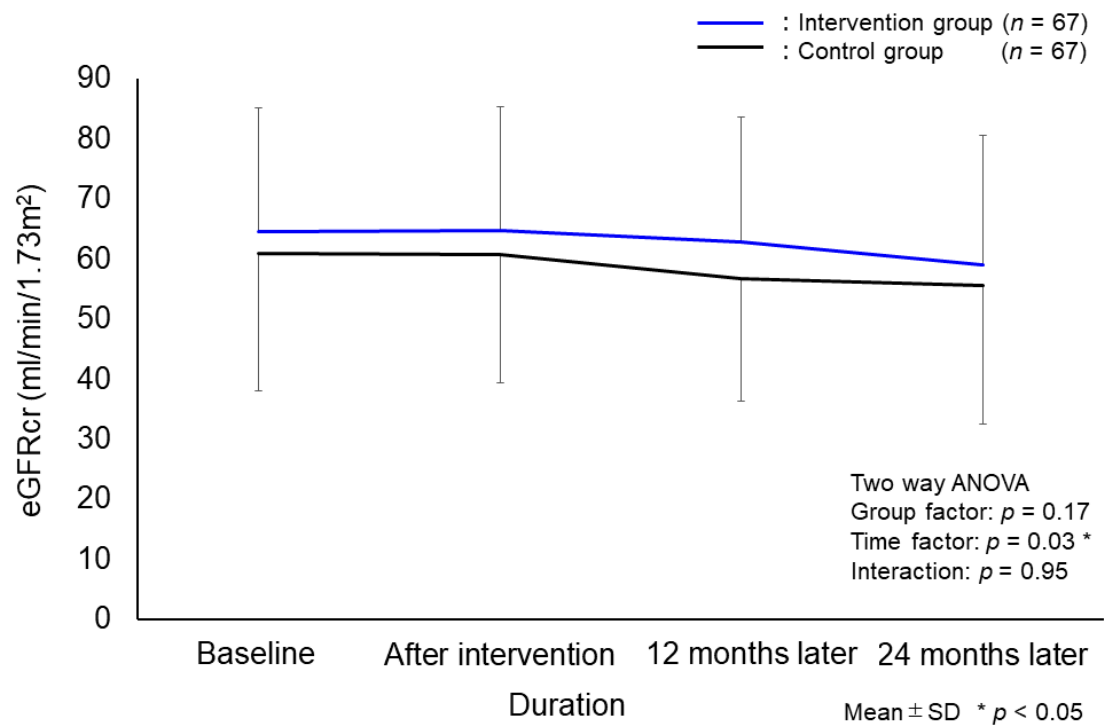

Figure S3 Changes in urinary Alb/Cre ratio over time

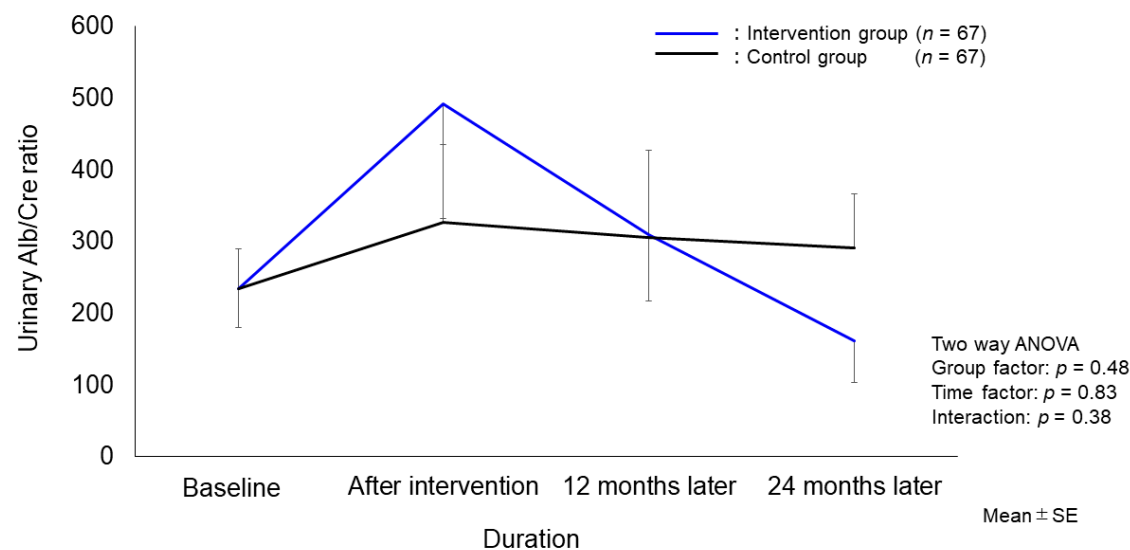

Table S1 DKD severity classification

| Albuminuria segment                                                                                                                                                   |       | A1                         | A2                         | A3                                                             |
|-----------------------------------------------------------------------------------------------------------------------------------------------------------------------|-------|----------------------------|----------------------------|----------------------------------------------------------------|
| Determination of urinary albumin<br>Urinary albumin/Creatine ratio (mg / gCr)<br>Determination of urinary protein<br>(Urinary protein / creatine ratio)<br>( g / gCr) |       | Normal albuminuria<br>< 30 | Microalbuminuria<br>30-299 | Over albuminuria<br>≥ 300<br>or<br>Highly proteinuria<br>≥ 0.5 |
| eGFR<br>segment<br>( ml / min /1.73m <sup>2</sup> )                                                                                                                   | ≥ 90  | Stage I                    | Stage II                   | Stage III                                                      |
|                                                                                                                                                                       | 60-89 |                            |                            |                                                                |
|                                                                                                                                                                       | 45-59 | Stage I                    | Stage II                   | Stage III                                                      |
|                                                                                                                                                                       | 30-44 |                            |                            |                                                                |
|                                                                                                                                                                       | 15-29 | Stage IV                   | Stage IV                   | Stage IV                                                       |
|                                                                                                                                                                       | < 15  | Stage V                    | Stage V                    | Stage V                                                        |
| During dialysis therapy                                                                                                                                               |       | Stage V                    | Stage V                    | Stage V                                                        |

Table S2 Physical activity of IPAQ in the intervention group during the six months intervention preceding follow-up

|                                     | Pre<br>intervention<br>( <i>n</i> = 67) | 2nd month<br>( <i>n</i> = 67) | 3rd month<br>( <i>n</i> = 67) | 4th month<br>( <i>n</i> = 67) | 5th month<br>( <i>n</i> = 66) | 6th month<br>( <i>n</i> = 67) | ANOVA<br>results |
|-------------------------------------|-----------------------------------------|-------------------------------|-------------------------------|-------------------------------|-------------------------------|-------------------------------|------------------|
| Physical<br>activity<br>(kcal/week) | 544.9<br>±1503.6                        | 1295.1<br>±1887.2             | 1708.8<br>±2162.9 *           | 1750.4<br>±2043.0 *           | 1632.9<br>±1880.9 *           | 1344.0<br>±1644.4             | <i>p</i> = 0.002 |

Data are presented as mean ± standard deviation. One-way ANOVA and Tukey HSD were used for statistical analysis.

The significance level was set at 5%. *p* \*: vs. Pre intervention with *p* < 0.05.
